# Supplementary material
Source: PubMed Central journal article supplement (PMC8201879)
Supplement: pnas.2012941118.sapp.pdf [file pnas.2012941118.sapp.pdf]

# PNAS

www.pnas.org

## Supplementary Information for

Attention-bias modification in drug addiction: Enhancing control of subsequent habits.

**Authors:** Muhammad A. Parvaz<sup>\*1,2</sup>, Pias Malaker<sup>1</sup>, Anna Zilverstand<sup>3</sup>, Scott J. Moeller<sup>4</sup>, Nelly Alia-Klein<sup>1,2</sup>, Rita Z. Goldstein<sup>\*1,2</sup>.

### Affiliations:

<sup>1</sup>Department of Psychiatry, Icahn School of Medicine at Mount Sinai, New York, NY 10029

<sup>2</sup>Department of Neuroscience, Icahn School of Medicine at Mount Sinai, New York, NY 10029

<sup>3</sup>Department of Psychiatry and Behavioral Sciences, University of Minnesota, Minneapolis, MN 55414

<sup>4</sup>Departments of Psychiatry and Psychology, Renaissance School of Medicine at Stony Brook University, Stony Brook, NY 11794

\*Correspondence may be addressed to: Muhammad A Parvaz, One Gustav L. Levy Place, Box 1230, New York, NY 10029-6574; Tel: 212-241-3638; Fax: 212-803-6743; [Muhammad.Parvaz@mssm.edu](mailto:Muhammad.Parvaz@mssm.edu). Or Rita Z. Goldstein, One Gustav L. Levy Place, Box 1230, New York, NY 10029-6574; Tel: 212-659-8886; [Rita.Goldstein@mssm.edu](mailto:Rita.Goldstein@mssm.edu).

### This PDF file includes:

Supplementary text  
Tables S1 to S4

## Supplementary Information Text

### *Stimuli*

All the International Affective Picture System pictures used for the neutral blocks are as follows:

2020.bmp, 2025.bmp, 2038.bmp, 2102.bmp, 2104.bmp, 2210.bmp, 2215.bmp, 2381.bmp, 2385.bmp, 2393.bmp, 2396.bmp, 2397.bmp, 2440.bmp, 2441.bmp, 2480.bmp, 2493.bmp, 2499.bmp, 2635.bmp, 7000.bmp, 7002.bmp, 7004.bmp, 7006.bmp, 7009.bmp, 7010.bmp, 7020.bmp, 7034.bmp, 7036.bmp, 7038.bmp, 7041.bmp, 7052.bmp

All the IAPS pictures used for the threat blocks are as follows:

1110.bmp, 1120.bmp, 1301.bmp, 1321.bmp, 1525.bmp, 1930.bmp, 2691.bmp, 2811.bmp, 3181.bmp, 3500.bmp, 3530.bmp, 5971.bmp, 6021.bmp, 6200.bmp, 6210.bmp, 6212.bmp, 6230.bmp, 6260.bmp, 6300.bmp, 6350.bmp, 6360.bmp, 6510.bmp, 6550.bmp, 6560.bmp, 6571.bmp, 6836.bmp, 8485.bmp, 9423.bmp, 9425.bmp, 9495.bmp, 9600.bmp, 9611.bmp, 9620.bmp, 9621.bmp, 9622.bmp, 9630.bmp, 9635.1.bmp, 9901.bmp, 9902.bmp, 9925.bmp, 1050.bmp, 1201.bmp, 1205.bmp, 1300.bmp, 6211.bmp, 6213.bmp, 6242.bmp, 6250.1.bmp, 6312.bmp, 6313.bmp, 6315.bmp, 6530.bmp, 6821.bmp, 6834.bmp, 6838.bmp, 9424.bmp, 9427.bmp, 9428.bmp, 9903.bmp, 9920.bmp

### *Demographics*

The HC and iCUD groups did not differ on age, gender, race, education, and non-verbal IQ ( $p>0.08$ ). Although iCUD reported significantly more dysphoric symptoms [total score on the Beck Depression Inventory (BDI)] and higher frequency of cigarette smoking compared to HC,

severity of dysphoric symptoms and cigarette use (number of cigarettes smoked per day) did not correlate with pre-instruction LPP amplitudes [BDI: (Drug:  $r=0.015$ ,  $p>0.1$ ; Threat:  $r=-0.010$ ,  $p>0.1$ ; Neutral:  $r=-0.026$ ,  $p>0.1$ ) | number of cigarettes smoked per day: (Drug:  $r=0.128$ ,  $p>0.1$ ; Threat:  $r=-0.128$ ,  $p>0.1$ ; Neutral:  $r=0.075$ ,  $p>0.1$ )], post-instruction LPP amplitudes [BDI: (Drug Look:  $r=0.014$ ,  $p>0.1$ ; Drug Decrease:  $r=-0.149$ ,  $p>0.1$ ; Threat Look:  $r=-0.016$ ,  $p>0.1$ ; Threat Decrease:  $r=0.004$ ,  $p>0.1$ ; Neutral Look:  $r=0.074$ ,  $p>0.1$ ) | number of cigarettes smoked per day: (Drug Look:  $r=0.069$ ,  $p>0.1$ ; Drug Decrease:  $r=-0.123$ ,  $p>0.1$ ; Threat Look:  $r=-0.061$ ,  $p>0.1$ ; Threat Decrease:  $r=-0.071$ ,  $p>0.1$ ; Neutral Look:  $r=-0.165$ ,  $p>0.1$ )] nor with subsequent changes in GD [BDI: (Drug (Look-Decrease):  $r=-0.016$ ,  $p>0.1$ ; Threat (Look-Decrease):  $r=-0.169$ ,  $p>0.1$ ) | number of cigarettes smoked per day: (Drug (Look-Decrease):  $r=-0.075$ ,  $p>0.1$ ; Threat (Look-Decrease):  $r=-0.048$ ,  $p>0.1$ )], and therefore, were not used as covariates in our analyses.

**Table S1**

Average number of trials used for **(A)** averaged ERPs, and **(B)** average GD per condition for iCUD and HC. iCUD demonstrated a significantly greater number of GD trials for the pre-instruction drug-related [ $t(56)=2.33, p=0.023$ ] and neutral [ $t(55)=-2.39, p=0.020$ ] pictures relative to HC.

**A)**

|                | HC (N=28)    |              | iCUD (N=30)  |              |
|----------------|--------------|--------------|--------------|--------------|
|                | Look         | Decrease     | Look         | Decrease     |
| <b>Drug</b>    | 27.29 ± 2.83 | 27.46 ± 2.91 | 26.77 ± 2.54 | 26.80 ± 2.52 |
| <b>Threat</b>  | 27.07 ± 3.74 | 26.61 ± 3.79 | 26.43 ± 3.79 | 26.70 ± 3.56 |
| <b>Neutral</b> | 54.39 ± 5.85 | -            | 53.50 ± 4.48 | -            |

**B)**

|                | HC (N=28)       |                  |          |                  |          |
|----------------|-----------------|------------------|----------|------------------|----------|
|                | Pre-Instruction | Post-Instruction |          | Attention-Screen |          |
|                |                 | Look             | Decrease | Look             | Decrease |
| <b>Drug</b>    | 15.61 ±         | 19.57 ±          | 19.46 ±  | 15.64 ±          | 16.18 ±  |
|                | 10.98*          | 8.49             | 8.72     | 7.26             | 6.87     |
| <b>Threat</b>  | 16.57 ±         | 21.21 ±          | 20.75 ±  | 16.07 ±          | 16.17 ±  |
|                | 12.31           | 8.99             | 8.98     | 7.26             | 7.47     |
| <b>Neutral</b> | 16.32 ±         | 41.82 ±          | -        | 33.89 ±          | -        |
|                | 11.31*          | 16.00            |          | 12.43            |          |

  

|                | iCUD (N=30)     |                  |          |                  |          |
|----------------|-----------------|------------------|----------|------------------|----------|
|                | Pre-Instruction | Post-Instruction |          | Attention-Screen |          |
|                |                 | Look             | Decrease | Look             | Decrease |
| <b>Drug</b>    | 22.30 ±         | 22.40 ±          | 21.93 ±  | 18.10 ±          | 17.37 ±  |
|                | 10.88*          | 6.03             | 6.64     | 5.05             | 5.83     |
| <b>Threat</b>  | 20.87 ±         | 22.13 ±          | 21.47 ±  | 17.87 ±          | 17.07 ±  |
|                | 9.97            | 8.22             | 7.70     | 6.87             | 6.44     |
| <b>Neutral</b> | 21.00 ±         | 45.13 ±          | -        | 36.57 ±          | -        |
|                | 8.94*           | 13.17            |          | 10.57            |          |

\*Significant difference between healthy controls (HC) and individuals with cocaine use disorder (iCUD) ( $p<0.05$ ). Event related potentials (ERPs), Gaze Duration (GD)

**Table S2**

Pre- and post-instruction LPP amplitudes and “Like” and “Want” ratings for each picture type and instruction.

| HC (N=28)   |                                |                                 |                              |                 |                 |
|-------------|--------------------------------|---------------------------------|------------------------------|-----------------|-----------------|
|             | Pre-instruction LPP ( $\mu$ V) | Post-instruction LPP ( $\mu$ V) |                              | Like ratings    | Want ratings    |
| Drug        | 0.87 $\pm$ 1.46                | Look                            | 0.94 $\pm$ 2.21              | 0.53 $\pm$ 0.93 | 0.27 $\pm$ 0.61 |
|             |                                | Decrease                        | 0.41 $\pm$ 2.12              | 0.44 $\pm$ 0.78 | 0.18 $\pm$ 0.29 |
| Threat      | 1.39 $\pm$ 1.63 <sup>b</sup>   | Look                            | 0.97 $\pm$ 1.80 <sup>d</sup> | 0.54 $\pm$ 0.93 | 0.23 $\pm$ 0.43 |
|             |                                | Decrease                        | 0.48 $\pm$ 1.57              | 0.76 $\pm$ 0.79 | 0.42 $\pm$ 0.51 |
| Neutral     | 0.74 $\pm$ 1.10                | Look                            | 0.24 $\pm$ 1.30              | 1.71 $\pm$ 0.77 | 1.17 $\pm$ 0.61 |
| iCUD (N=30) |                                |                                 |                              |                 |                 |
|             | Pre-instruction LPP ( $\mu$ V) | Post-instruction LPP ( $\mu$ V) |                              | Like ratings    | Want ratings    |
| Drug        | 1.24 $\pm$ 1.22 <sup>a</sup>   | Look                            | 0.40 $\pm$ 1.33 <sup>c</sup> | 1.76 $\pm$ 1.26 | 1.59 $\pm$ 1.28 |
|             |                                | Decrease                        | -0.37 $\pm$ 1.69             | 1.71 $\pm$ 1.07 | 1.45 $\pm$ 1.07 |
| Threat      | 1.27 $\pm$ 1.41 <sup>b</sup>   | Look                            | 0.41 $\pm$ 1.76              | 0.77 $\pm$ 0.77 | 0.65 $\pm$ 0.73 |
|             |                                | Decrease                        | -0.14 $\pm$ 2.53             | 0.83 $\pm$ 0.67 | 0.73 $\pm$ 0.68 |
| Neutral     | 0.70 $\pm$ 1.27                | Look                            | 0.46 $\pm$ 1.74              | 1.73 $\pm$ 0.62 | 1.48 $\pm$ 0.70 |

Means  $\pm$  standard deviation (S.D.). Within-group significant differences ( $p < 0.05$ ) are denoted by <sup>a</sup>Drug>Neutral, <sup>b</sup>Threat>Neutral, <sup>c</sup>Drug-Look>Drug-Decrease, <sup>d</sup>Threat-Look>Threat-Decrease. Healthy controls (HC); individuals with cocaine user disorder (iCUD).

**Table S3**

The GD (msec) for each picture type and instruction. On the *attention screen*, three pictures (each of a different category; drug, threat, and neutral) and a blank were assigned randomly per quadrant and GD was assessed for each quadrant.

|         |          | HC (N=28)       |                 |                |                 |
|---------|----------|-----------------|-----------------|----------------|-----------------|
|         |          | Drug            | Threat          | Neutral        | Blank           |
| Drug    | Look     | 283.03 ± 85.13  | 307.82 ± 102.67 | 331.85 ± 92.50 | 387.45 ± 83.63  |
|         | Decrease | 293.94 ± 104.14 | 318.32 ± 74.01  | 318.28 ± 79.42 | 373.27 ± 99.89  |
| Threat  | Look     | 325.28 ± 117.21 | 292.67 ± 116.89 | 311.61 ± 75.93 | 380.68 ± 126.20 |
|         | Decrease | 304.51 ± 101.99 | 310.80 ± 114.02 | 308.98 ± 74.15 | 402.47 ± 107.79 |
| Neutral | Look     | 344.41 ± 73.81  | 303.17 ± 65.52  | 308.13 ± 87.68 | 370.52 ± 68.74  |

  

|         |          | iCUD (N=30)                 |                 |                 |                 |
|---------|----------|-----------------------------|-----------------|-----------------|-----------------|
|         |          | Drug                        | Threat          | Neutral         | Blank           |
| Drug    | Look     | 297.68 ± 78.04 <sup>c</sup> | 303.09 ± 69.71  | 322.87 ± 93.64  | 418.62 ± 101.49 |
|         | Decrease | 252.93 ± 81.35              | 308.42 ± 126.59 | 377.57 ± 105.56 | 396.10 ± 114.49 |
| Threat  | Look     | 301.22 ± 95.66              | 296.45 ± 97.49  | 336.06 ± 99.75  | 385.60 ± 110.28 |
|         | Decrease | 278.42 ± 72.21              | 289.59 ± 80.55  | 333.43 ± 98.54  | 412.25 ± 101.24 |
| Neutral | Look     | 296.38 ± 55.94              | 298.18 ± 66.79  | 340.29 ± 63.39  | 411.82 ± 84.27  |

Means ± standard deviation (S.D.). Within-group significant differences ( $p < 0.05$ ) are denoted by <sup>a</sup>Drug>Neutral, <sup>b</sup>Threat>Neutral, <sup>c</sup>Drug-Look>Drug-Decrease, <sup>d</sup>Threat-Look>Threat-Decrease. Healthy controls (HC); individuals with cocaine user disorder (iCUD).

**Table S4**

Pre – (A) and post-instruction GD (B) for each picture type and instruction type for iCUD and HC.

**A)**

|                     | HC                 | N  | iCUD               | N  |
|---------------------|--------------------|----|--------------------|----|
| <b>Drug (ms)</b>    | 963.23 ±<br>65.09  | 26 | 970.96 ±<br>45.43  | 30 |
| <b>Threat (ms)</b>  | 945.21 ±<br>69.23  | 27 | 968.33 ±<br>43.03  | 29 |
| <b>Neutral (ms)</b> | 941.85 ±<br>68.17* | 27 | 977.47 ±<br>42.84* | 30 |

**B)**

Means ± standard

deviation (S.D.). \*

|                     | HC                  |    |                     |    | iCUD                |    |                     |    |
|---------------------|---------------------|----|---------------------|----|---------------------|----|---------------------|----|
|                     | Look                | N  | Decrease            | N  | Look                | N  | Decrease            | N  |
| <b>Drug (ms)</b>    | 4289.63 ±<br>574.27 | 28 | 4279.14 ±<br>533.17 | 27 | 4494.83 ±<br>409.60 | 30 | 4418.29 ±<br>444.35 | 30 |
| <b>Threat (ms)</b>  | 4375.98 ±<br>554.14 | 27 | 4383.78 ±<br>572.10 | 27 | 4503.55 ±<br>434.55 | 29 | 4504.64 ±<br>480.98 | 29 |
| <b>Neutral (ms)</b> | 4363.81 ±<br>459.21 | 28 | -                   | -  | 4477.22 ±<br>394.78 | 30 | -                   | -  |

Significant difference between healthy controls (HC) and individuals with cocaine use disorder (iCUD) ( $p < 0.05$ ). Gaze Duration (GD).
